# Supplementary material for: Ectopic Expression of Multiple Chrysanthemum (Chrysanthemum × morifolium) R2R3-MYB Transcription Factor Genes Regulates Anthocyanin Accumulation in Tobacco
Source: PubMed Central journal article supplement (PMC6826627; doi:10.3390/genes10100777), 2019-10-04
Supplement: genes-10-00777-s001.pdf [file genes-10-00777-s001.pdf]

Supplementary Table S1. List of GenBank accession numbers of species used in the present study.

| <b>Gene Name</b> | <b>GenBank Accession Number</b> | <b>Gene Name</b> | <b>GenBank Accession Number</b> |
|------------------|---------------------------------|------------------|---------------------------------|
| AtMYB0           | AT3G27920.1                     | AtMYB1           | AT3G09230.1                     |
| AtMYB2           | AT2G47190.1                     | AtMYB3           | AT4G01060.1                     |
| AtPC-MYB1        | AT4G32730.2                     | AtMYB3R-2        | AT4G00540.1                     |
| AtMYB3R-3        | AT3G09370.2                     | AtMYB3R-4        | AT5G11510.1                     |
| AtMYB3R-5        | AT5G02320.1                     | AtMYB6           | AT4G09460.1                     |
| AtMYB7           | AT2G16720.1                     | AtMYB8           | AT1G35515.1                     |
| AtMYB9           | AT5G16770.1                     | AtMYB10          | AT3G12820.1                     |
| AtMYB11          | AT3G62610.1                     | AtMYB12          | AT2G47460.1                     |
| AtMYB13          | AT1G06180.1                     | AtMYB14          | AT2G31180.1                     |
| AtMYB15          | AT3G23250.1                     | AtMYB16          | AT5G15310.1                     |
| AtMYB17          | AT3G61250.1                     | AtMYB18          | AT4G25560.1                     |
| AtMYB19          | AT5G52260.1                     | AtMYB20          | AT1G66230.1                     |
| AtMYB21          | AT3G27810.1                     | AtMYB22          | AT5G40430.1                     |
| AtMYB23          | AT5G40330.1                     | AtMYB24          | AT5G40350.1                     |
| AtMYB25          | AT2G39880.1                     | AtMYB26          | AT3G13890.1                     |
| AtMYB27          | AT3G53200.1                     | AtMYB28          | AT5G61420.2                     |
| AtMYB29          | AT5G07690.1                     | AtMYB30          | AT3G28910.1                     |
| AtMYB31          | AT1G74650.1                     | AtMYB32          | AT4G34990.1                     |
| AtMYB33          | AT5G06100.2                     | AtMYB34          | AT5G60890.1                     |
| AtMYB35          | AT3G28470.1                     | AtMYB36          | AT5G57620.1                     |
| AtMYB37          | AT5G23000.1                     | AtMYB38          | AT2G36890.1                     |
| AtMYB39          | AT4G17785.1                     | AtMYB40          | AT5G14340.1                     |
| AtMYB41          | AT4G28110.1                     | AtMYB42          | AT4G12350.1                     |
| AtMYB43          | AT5G16600.1                     | AtMYB44          | AT5G67300.1                     |
| AtMYB45          | AT3G48920.1                     | AtMYB46          | AT5G12870.1                     |
| AtMYB47          | AT1G18710.1                     | AtMYB48          | AT3G46130.1                     |
| AtMYB49          | AT5G54230.1                     | AtMYB50          | AT1G57560.1                     |
| AtMYB51          | AT1G18570.1                     | AtMYB52          | AT1G17950.1                     |
| AtMYB53          | AT5G65230.1                     | AtMYB54          | AT1G73410.1                     |
| AtMYB55          | AT4G01680.2                     | AtMYB56          | AT5G17800.1                     |
| AtMYB57          | AT3G01530.1                     | AtMYB58          | AT1G16490.1                     |
| AtMYB59          | AT5G59780.3                     | AtMYB60          | AT1G08810.1                     |
| AtMYB61          | AT1G09540.1                     | AtMYB62          | AT1G68320.1                     |
| AtMYB63          | AT1G79180.1                     | AtMYB64          | AT5G11050.1                     |
| AtMYB65          | AT3G11440.1                     | AtMYB66          | AT5G14750.1                     |
| AtMYB67          | AT3G12720.1                     | AtMYB68          | AT5G65790.1                     |
| AtMYB69          | AT4G33450.1                     | AtMYB70          | AT2G23290.1                     |
| AtMYB305         | AT3G24310.1                     | AtMYB72          | AT1G56160.1                     |
| AtMYB73          | AT4G37260.1                     | AtMYB74          | AT4G05100.1                     |

| <b>Gene Name</b> | <b>GenBank Accession Number</b> | <b>Gene Name</b> | <b>GenBank Accession Number</b> |
|------------------|---------------------------------|------------------|---------------------------------|
| AtMYB75          | AT1G56650.1                     | AtMYB76          | AT5G07700.1                     |
| AtMYB77          | AT3G50060.1                     | AtMYB78          | AT5G49620.2                     |
| AtMYB79          | AT4G13480.1                     | AtMYB80          | AT5G56110.1                     |
| AtMYB81          | AT2G26960.1                     | AtMYB82          | AT5G52600.1                     |
| AtMYB83          | AT3G08500.1                     | AtMYB84          | AT3G49690.1                     |
| AtMYB85          | AT4G22680.1                     | AtMYB86          | AT5G26660.1                     |
| AtMYB87          | AT4G37780.1                     | AtMYB88          | AT2G02820.2                     |
| AtMYB89          | AT5G39700.1                     | AtMYB90          | AT1G66390.1                     |
| AtMYB91          | AT2G37630.1                     | AtMYB92          | AT5G10280.1                     |
| AtMYB93          | AT1G34670.1                     | AtMYB94          | AT3G47600.1                     |
| AtMYB95          | AT1G74430.1                     | AtMYB96          | AT5G62470.2                     |
| AtMYB97          | AT4G26930.1                     | AtMYB98          | AT4G18770.1                     |
| AtMYB99          | AT5G62320.1                     | AtMYB100         | AT2G25230.1                     |
| AtMYB101         | AT2G32460.1                     | AtMYB102         | AT4G21440.1                     |
| AtMYB103         | AT1G63910.1                     | AtMYB104         | AT2G26950.1                     |
| AtMYB105         | AT1G69560.1                     | AtMYB106         | AT3G01140.1                     |
| AtMYB107         | AT3G02940.1                     | AtMYB108         | AT3G06490.1                     |
| AtMYB109         | AT3G55730.1                     | AtMYB110         | AT3G29020.2                     |
| AtMYB111         | AT5G49330.1                     | AtMYB112         | AT1G48000.1                     |
| AtMYB113         | AT1G66370.1                     | AtMYB114         | AT1G66380.1                     |
| AtMYB115         | AT5G40360.1                     | AtMYB116         | AT1G25340.1                     |
| AtMYB117         | AT1G26780.2                     | AtMYB118         | AT3G27785.1                     |
| AtMYB119         | AT5G58850.1                     | AtMYB120         | AT5G55020.1                     |
| AtMYB121         | AT3G30210.1                     | AtMYB122         | AT1G74080.1                     |
| AtMYB123         | AT5G35550.1                     | AtMYB124         | AT1G14350.1                     |
| AtMYBC1          | AT2G40970.1                     | AmROSEA1         | ABB83826.1                      |
| AmROSEA2         | ABB83827.1                      | AmVENOSA         | ABB83828.1                      |
| AmMYB308         | P81393.1                        | CsRuby           | NM_001288889                    |
| FaMYB1           | AF401220                        | FaMYB9           | JQ989281                        |
| FaMYB11          | JQ989282                        | LjTT2a           | AB300033                        |
| MdMYB10a         | ABB84754.1                      | MdMYB22          | AAZ20438.1                      |
| OsMYB3           | BAA23339.1                      | PhAN2            | AAF66727.1                      |
| PtMYB182         | AJI76863.1                      | TaMYB14          | AFJ53053.1                      |
| VvMYBA1          | BAD18977.1                      | VvMYBC2-L1       | AFX64995.1                      |
| VvMYBF1          | ACV81697.1                      | VvMYBPA2         | ACK56131.1                      |
| PhMYB27          | AHX24372.1                      | MdMYB16          | NP_001315806.1                  |
| ZjMYB12          | XP_015891841.1                  | MdMYB1           | ABK58136.1                      |
| PhPHZ            | ADW94951.1                      | PhDPL            | ADW94950.1                      |
